# Supplementary material for: Development of an artificial intelligence model for predicting the likelihood of human embryo euploidy based on blastocyst images from multiple imaging systems during IVF
Source: PubMed Central journal article supplement — Hum Reprod. 2022 Jun 8;37(8):1746–59. doi: 10.1093/humrep/deac131 (PMC9340116; doi:10.1093/humrep/deac131), 2022-06-08
Supplement: deac131_supplementary_figure_s1.pdf [file deac131_supplementary_figure_s1.pdf]

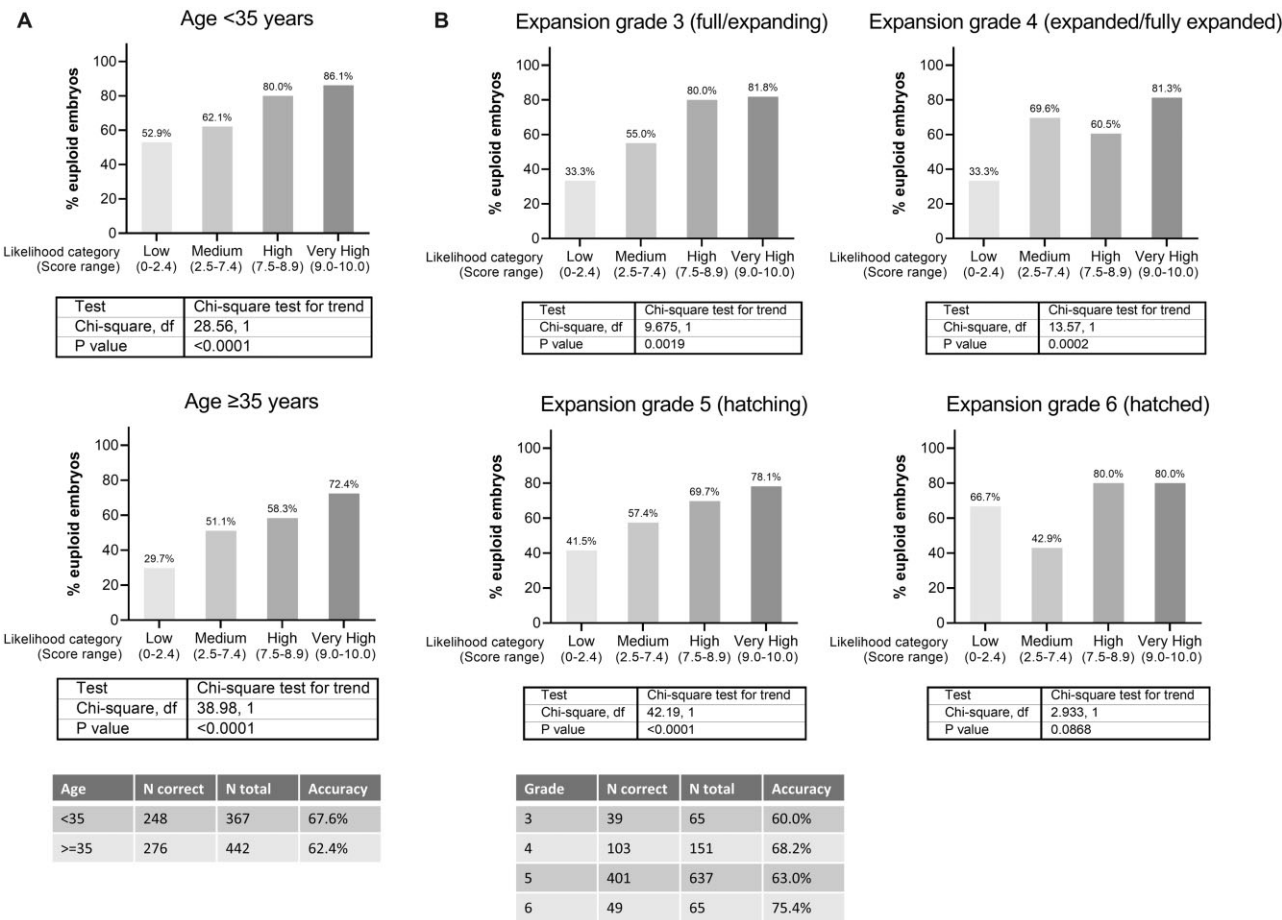

**Supplementary Figure S1. Performance of the Day 5 artificial intelligence (AI) model for predicting the likelihood of human embryo euploidy based on age and blastocyst expansion subgroups.** (A) The correlation between the genetics AI score and the proportion of euploid embryos was evaluated using four defined euploid likelihood categories as depicted. Correlations were evaluated for patients <35 and ≥35 years. Accuracy was also evaluated for these subgroups using a binary prediction threshold (<5.0/10.0 = aneuploid prediction, ≥5.0/10.0 = euploid prediction). (B) The correlation between the AI score and the proportion of euploid embryos was evaluated using four defined euploid likelihood categories in blastocyst expansion Stages 3, 4, 5 and 6 according to the Gardner grading system. Accuracy was also evaluated for these subgroups using a binary prediction threshold. df, degrees of freedom; N, number.
