# Supplementary material for: Development of an artificial intelligence model for predicting the likelihood of human embryo euploidy based on blastocyst images from multiple imaging systems during IVF
Source: PubMed Central journal article supplement — Hum Reprod. 2022 Jun 8;37(8):1746–59. doi: 10.1093/humrep/deac131 (PMC9340116; doi:10.1093/humrep/deac131), 2022-06-08
Supplement: deac131_supplementary_table_si.pdf [file deac131_supplementary_table_si.pdf]

**Supplementary Table SI** Preimplantation genetic testing for aneuploidies (PGT-As) methods for each clinic.

| IVF clinic                                                                                                                 | Name of testing laboratory                 | Genetic testing method | Genetic testing platform                       | Thresholds          |                     |                                                                             |
|----------------------------------------------------------------------------------------------------------------------------|--------------------------------------------|------------------------|------------------------------------------------|---------------------|---------------------|-----------------------------------------------------------------------------|
|                                                                                                                            |                                            |                        |                                                | Euploid             | Aneuploid           | Mosaic                                                                      |
| Ovation—Austin<br>San Antonio IVF<br>Midwest Fertility Specialists<br>California Fertility Partners<br>Ovation—Baton Rouge | Ovation Fertility Genetics Laboratories    | NGS                    | VeriSeq (Illumina, CA, USA)                    | ≤30% abnormal cells | >70% abnormal cells | 31–70% abnormal cells (mosaic-low = 31–50%, mosaic-high = 51–70%)           |
| Alpha IVF Women's Specialists                                                                                              | Alpha IVF Women's Specialists              | NGS                    | Ion Torrent (Thermo Fisher Scientific, MA USA) | ≤20% abnormal cells | >80% abnormal cells | 21–80% abnormal cells (mosaic-low = 21–50%, mosaic-high = 51–80%)           |
| Wings IVF Women's Hospital                                                                                                 | Genexplore Diagnostics and Research Centre | NGS                    | Ion Torrent (Thermo Fisher Scientific, MA USA) | ≤20% abnormal cells | >80% abnormal cells | Not provided (no mosaic embryos in dataset)                                 |
| IVF-Spain—Alicante<br>IVF-Spain—Madrid<br>IVF-Spain—San Sebastián                                                          | Integrated Genetic Lab Services            | NGS                    | VeriSeq (Illumina, CA, USA)                    | ≤30% abnormal cells | >70% abnormal cells | 31–70% abnormal cells (information for mosaic-low/mosaic-high not provided) |

NGS, next generation sequencing.
