# Supplementary material for: Development of an artificial intelligence model for predicting the likelihood of human embryo euploidy based on blastocyst images from multiple imaging systems during IVF
Source: PubMed Central journal article supplement — Hum Reprod. 2022 Jun 8;37(8):1746–59. doi: 10.1093/humrep/deac131 (PMC9340116; doi:10.1093/humrep/deac131), 2022-06-08
Supplement: deac131_supplementary_table_sii.pdf [file deac131_supplementary_table_sii.pdf]

**Supplementary Table SII** Imaging systems used in training and testing.

| IVF clinic                    | Model of microscope (and/or laser system) | Model of camera              |
|-------------------------------|-------------------------------------------|------------------------------|
| Ovation—Austin                | Cooper Surgical Saturn 5                  | Watec Wat-221S               |
|                               | Cooper Surgical Saturn 5                  | Cooper Surgical DC2          |
| San Antonio IVF               | Cooper Surgical Saturn 5                  | Watec Wat-221S               |
| Midwest Fertility Specialists | Cooper Surgical Saturn 5                  | Watec Wat-221S               |
|                               | Cooper Surgical Saturn 5                  | Cooper Surgical DC1          |
| California Fertility Partners | Vitrolife Octax                           | Vitrolife Octax camera       |
|                               | Hamilton Thorne LYKOS                     | JAI GO-5000C-USB             |
| Ovation—Baton Rouge           | Hamilton Thorne LYKOS                     | Watec Wat-221S               |
|                               | Hamilton Thorne LYKOS                     | JAI GO-5000C-USB             |
| Alpha IVF Women's Specialists | Vitrolife EmbryoScope time-lapse          | Vitrolife EmbryoScope camera |
| Wings IVF Women's Hospital    | Cooper Surgical Saturn 3                  | Cooper Surgical RI camera    |
| IVF-Spain—Alicante            | Merck GERI time-lapse                     | Merck GERI camera            |
| IVF-Spain—Madrid              | Merck GERI time-lapse                     | Merck GERI camera            |
| IVF-Spain—San Sebastián       | Merck GERI time-lapse                     | Merck GERI camera            |
