# Supplementary material for: Development of an artificial intelligence model for predicting the likelihood of human embryo euploidy based on blastocyst images from multiple imaging systems during IVF
Source: PubMed Central journal article supplement — Hum Reprod. 2022 Jun 8;37(8):1746–59. doi: 10.1093/humrep/deac131 (PMC9340116; doi:10.1093/humrep/deac131), 2022-06-08
Supplement: deac131_supplementary_table_siii.pdf [file deac131_supplementary_table_siii.pdf]

**Supplementary Table SIII** Additional datasets used in evaluating performance of the genetics artificial intelligence model.

| Datasets <sup>a</sup>                                   | Day 5 mosaic<br>test dataset | Day 6 test<br>dataset | Day 5 double-blind<br>test<br>dataset—India | Day 5 double-blind<br>test<br>dataset—Spain<br>(GERI) | Day 5 double-blind<br>test<br>dataset—Malaysia<br>(EmbryoScope) <sup>c</sup> |
|---------------------------------------------------------|------------------------------|-----------------------|---------------------------------------------|-------------------------------------------------------|------------------------------------------------------------------------------|
| Total images                                            | 403                          | 5574                  | 178                                         | 182                                                   | 141                                                                          |
| Number of patients                                      | 334                          | 2571                  | 31                                          | 63                                                    | 65                                                                           |
| Dates treated                                           | 2018–2020                    | 2013–2020             | Jun–Aug 2021                                | May–Sep 2021                                          | Nov 2019–Oct 2020                                                            |
| Number of cycles                                        | 334                          | 2651                  | 31                                          | 63                                                    | 66                                                                           |
| Average cycles per patient (range)                      | 1.0 (1–1)                    | 1.0 (1–3)             | 1.0 (1–1)                                   | 1.0 (1–1)                                             | 1.0 (1–2)                                                                    |
| Average embryo cohort size (range) <sup>b</sup>         | 1.2 (1–6)                    | 2.1 (1–17)            | 6.4 (2–12)                                  | 2.7 (1–14)                                            | 2.1 (1–11)                                                                   |
| Average patient age in years (range)                    | 35.0 (19–45)                 | 36.2 (19–51)          | 34.6 (25–51)                                | 29.0 (18–43)                                          | 36.8 (26–49)                                                                 |
| Number of donor gamete(s) used (%)                      | 50 (12.4%)                   | 932 (16.7%)           | Not recorded                                | 11 (6.0%)                                             | Not recorded                                                                 |
| Number of euploid embryos (%)                           | 0 (0.0%)                     | 2941 (52.8%)          | 132 (74.2%)                                 | 112 (61.5%)                                           | 83 (58.9%)                                                                   |
| Number of aneuploid embryos (%)                         | 0 (0.0%)                     | 2633 (47.2%)          | 46 (25.8%)                                  | 70 (38.5%)                                            | 58 (41.1%)                                                                   |
| Number of mosaic embryos (%)                            | 403 (100.0%)                 | 0 (0.0%)              | 0 (0.0%)                                    | 0 (0.0%)                                              | 0 (0.0%)                                                                     |
| <i>Origin of images</i>                                 |                              |                       |                                             |                                                       |                                                                              |
| Ovation—Austin (TX, USA)                                | 209 (51.9%)                  | 3944 (70.8%)          | 0 (0.0%)                                    | 0 (0.0%)                                              | 0 (0.0%)                                                                     |
| San Antonio IVF (TX, USA)                               | 22 (5.5%)                    | 716 (12.8%)           | 0 (0.0%)                                    | 0 (0.0%)                                              | 0 (0.0%)                                                                     |
| Midwest Fertility Specialists (IN, USA)                 | 33 (8.2%)                    | 300 (5.4%)            | 0 (0.0%)                                    | 0 (0.0%)                                              | 0 (0.0%)                                                                     |
| California Fertility Partners (CA, USA)                 | 139 (34.4%)                  | 605 (10.9%)           | 0 (0.0%)                                    | 0 (0.0%)                                              | 0 (0.0%)                                                                     |
| Ovation—Baton Rouge (LA, USA)                           | 0 (0.0%)                     | 9 (0.1%)              | 0 (0.0%)                                    | 0 (0.0%)                                              | 0 (0.0%)                                                                     |
| Wings IVF Women's Hospital<br>(Ahmedabad, India)        | 0 (0.0%)                     | 0 (0.0%)              | 178 (100.0%)                                | 0 (0.0%)                                              | 0 (0.0%)                                                                     |
| IVF-Spain (Alicante, Spain)                             | 0 (0.0%)                     | 0 (0.0%)              | 0 (0.0%)                                    | 83 (45.6%)                                            | 0 (0.0%)                                                                     |
| IVF-Spain (Madrid, Spain)                               | 0 (0.0%)                     | 0 (0.0%)              | 0 (0.0%)                                    | 66 (36.3%)                                            | 0 (0.0%)                                                                     |
| IVF-Spain (San Sebastián, Spain)                        | 0 (0.0%)                     | 0 (0.0%)              | 0 (0.0%)                                    | 33 (18.1%)                                            | 0 (0.0%)                                                                     |
| Alpha IVF & Women's Specialists<br>(Selangor, Malaysia) | 0 (0.0%)                     | 0 (0.0%)              | 0 (0.0%)                                    | 0 (0.0%)                                              | 141 (100.0%)                                                                 |

<sup>a</sup>All datasets for evaluating performance were uncleansed (untrainable data cleansing (UDC) not applied).<sup>b</sup>Some cohorts consisted of a combination of Day 5 and Day 6 embryos—these were separated according to dataset.<sup>c</sup>Time-lapse images for an additional 16 mosaic and aneuploid embryos were provided by Alpha IVF & Women's Specialists for preimplantation testing for aneuploidies (PGT-As) rebiopsy analyses. See [Supplementary Table SV](#) for more information.
