# Supplementary material for: Development of an artificial intelligence model for predicting the likelihood of human embryo euploidy based on blastocyst images from multiple imaging systems during IVF
Source: PubMed Central journal article supplement — Hum Reprod. 2022 Jun 8;37(8):1746–59. doi: 10.1093/humrep/deac131 (PMC9340116; doi:10.1093/humrep/deac131), 2022-06-08
Supplement: deac131_supplementary_table_sv.pdf [file deac131_supplementary_table_sv.pdf]

**Supplementary Table SV** Results of rebiopsy preimplantation genetic testing for aneuploidies (PGT-As) analyses.

| Embryo No. <sup>a</sup>              | Embryo age (days) | Genetics AI score | Genetics AI model prediction | PGT-A results #1 | Genetics AI model correct? <sup>b</sup> | PGT-A results #2 | Genetics AI model correct? <sup>b</sup> | PGT Re-test agreement <sup>c</sup> |
|--------------------------------------|-------------------|-------------------|------------------------------|------------------|-----------------------------------------|------------------|-----------------------------------------|------------------------------------|
| 1                                    | 6                 | 9.1               | Euploid/mosaic-low           | Aneuploid        | No                                      | Aneuploid        | No                                      | Yes                                |
| 1                                    | 6                 | 1.8               | Aneuploid/mosaic-high        | Mosaic-Low       | Yes                                     | Mosaic-Low       | Yes                                     | Yes                                |
| 2                                    | 5                 | 6.3               | Euploid/mosaic-low           | Aneuploid        | No                                      | Aneuploid        | No                                      | Yes                                |
| 4                                    | 5                 | 8.6               | Euploid/mosaic-low           | Mosaic-High      | No                                      | Aneuploid        | No                                      | Yes                                |
| 5                                    | 5                 | 8.0               | Euploid/mosaic-low           | Mosaic-High      | No                                      | Euploid          | Yes                                     | No                                 |
| 6                                    | 5                 | 7.1               | Euploid/mosaic-low           | Aneuploid        | No                                      | Mosaic-Low       | Yes                                     | No                                 |
| 7                                    | 5                 | 9.8               | Euploid/mosaic-low           | Mosaic-Low       | Yes                                     | Euploid          | Yes                                     | Yes                                |
| 8                                    | 5                 | 9.7               | Euploid/mosaic-low           | Mosaic-Low       | Yes                                     | Mosaic-Low       | Yes                                     | Yes                                |
| 9                                    | 5                 | 2.1               | Aneuploid/mosaic-high        | Mosaic-Low       | No                                      | Euploid          | No                                      | Yes                                |
| 10                                   | 6                 | 4.2               | Aneuploid/mosaic-high        | Mosaic-Low       | No                                      | Euploid          | No                                      | Yes                                |
| 11                                   | 5                 | 7.9               | Euploid/mosaic-low           | Mosaic-Low       | Yes                                     | Mosaic-Low       | Yes                                     | Yes                                |
| 12                                   | 5                 | 8.4               | Euploid/mosaic-low           | Mosaic-Low       | Yes                                     | Euploid          | Yes                                     | Yes                                |
| 13                                   | 5                 | 2.6               | Aneuploid/mosaic-high        | Mosaic-Low       | No                                      | Mosaic-High      | Yes                                     | No                                 |
| 14                                   | 6                 | 0.8               | Aneuploid/mosaic-high        | Mosaic-Low       | Yes                                     | Mosaic-Low       | Yes                                     | Yes                                |
| 15                                   | 5                 | 7.3               | Euploid/mosaic-low           | Mosaic-Low       | Yes                                     | Euploid          | Yes                                     | Yes                                |
| 16                                   | 5                 | 6.4               | Euploid/mosaic-low           | Mosaic-Low       | Yes                                     | Euploid          | Yes                                     | Yes                                |
| <i>All embryos (Day 5 and Day 6)</i> |                   |                   |                              |                  |                                         |                  |                                         |                                    |
| No. of correct/in agreement          |                   |                   |                              |                  | 8                                       | —                | 11                                      | 13                                 |
| Correct/in agreement (%)             |                   |                   |                              |                  | 50.0%                                   | —                | 68.8%                                   | 81.3%                              |
| <i>Day 5 embryos only</i>            |                   |                   |                              |                  |                                         |                  |                                         |                                    |
| No. of correct/in agreement          |                   |                   |                              |                  | 6                                       | —                | 9                                       | 9                                  |
| Correct/in agreement (%)             |                   |                   |                              |                  | 50.0%                                   | —                | 75.0%                                   | 75.0%                              |

<sup>a</sup>Data were provided for 16 embryos initially classified as aneuploid or mosaic by Alpha Fertility (Selangor, Malaysia), as described above. Data were obtained from 16 patients treated between May–Sep 2021, with average age 34.4 years (range 27–43 years).

<sup>b</sup>Artificial intelligence (AI) model predictions were as follows:  $\geq 5.0/10.0$  = euploid/mosaic-low,  $<5.0/10.0$  = aneuploid/mosaic-high.

<sup>c</sup>For agreement between PGT-A tests, results were required to be either euploid or mosaic-low in both tests, OR aneuploid or mosaic-high in both tests. No., number.
